# Supplementary material
Source: Springer Nature journal article supplement (https://www.springermedizin.de/resource/supplementary/12889_2005_314_MOESM2_ESM.pdf/9500932)
Supplement: MOESM2 [file 9500932]

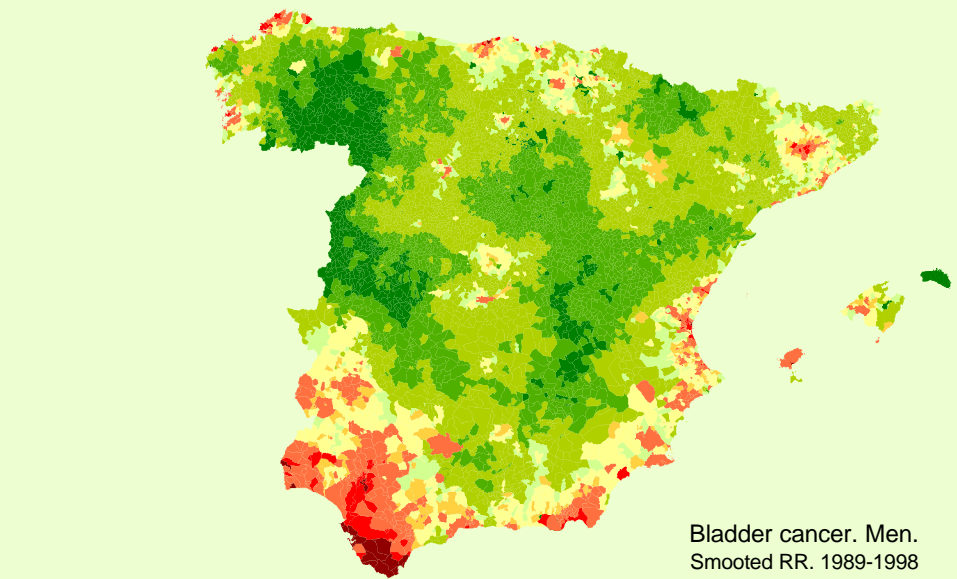

Bladder cancer. Men.  
Smoothed RR. 1989-1998

|              |        |
|--------------|--------|
| 1.5 and more | (28)   |
| 1.3 - 1.5    | (73)   |
| 1.1 - 1.3    | (407)  |
| 1.05 - 1.1   | (260)  |
| 0.95 - 1.05  | (966)  |
| 0.91 - 0.95  | (585)  |
| 0.77 - 0.91  | (3258) |
| 0.67 - 0.77  | (1968) |
| 0 - 0.67     | (647)  |

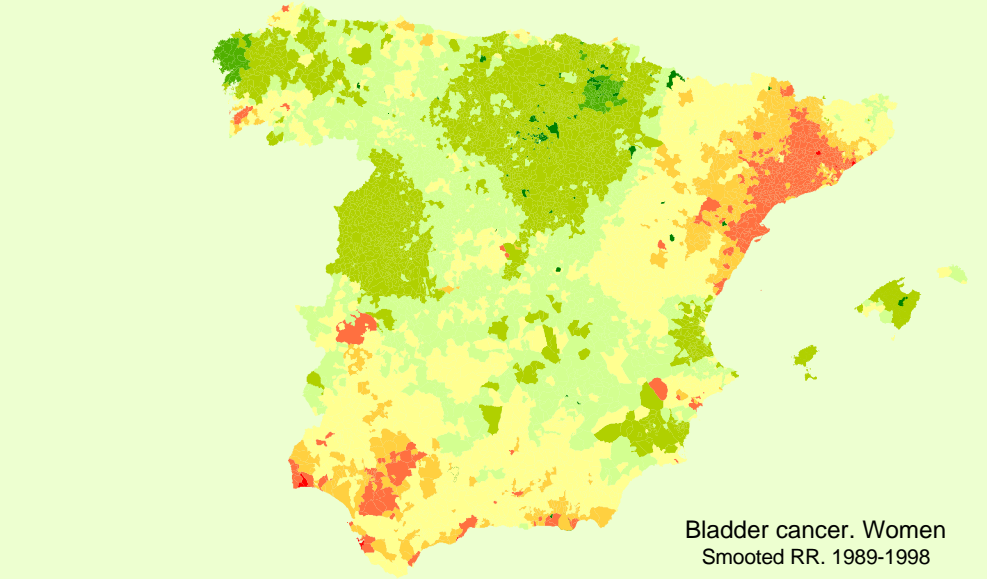

Bladder cancer. Women  
Smoothed RR. 1989-1998

|              |        |
|--------------|--------|
| 1.5 and more | (7)    |
| 1.3 - 1.5    | (29)   |
| 1.1 - 1.3    | (560)  |
| 1.05 - 1.1   | (562)  |
| 0.95 - 1.05  | (2145) |
| 0.91 - 0.95  | (2108) |
| 0.77 - 0.91  | (2534) |
| 0.67 - 0.77  | (125)  |
| 0 - 0.67     | (122)  |

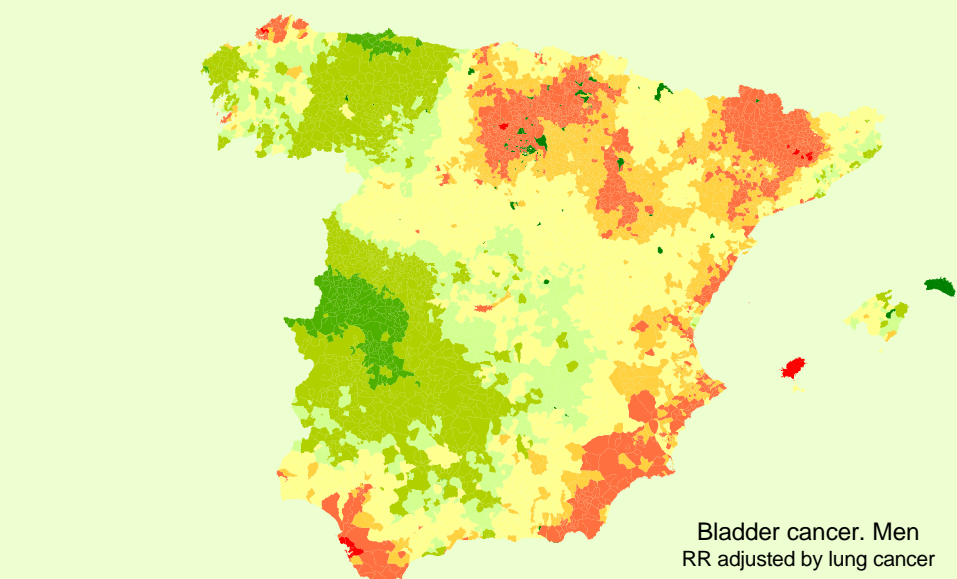

Bladder cancer. Men  
RR adjusted by lung cancer

|              |        |
|--------------|--------|
| 1.5 and more | (5)    |
| 1.3 - 1.5    | (41)   |
| 1.1 - 1.3    | (1255) |
| 1.05 - 1.1   | (1394) |
| 0.95 - 1.05  | (3114) |
| 0.91 - 0.95  | (984)  |
| 0.77 - 0.91  | (1085) |
| 0.67 - 0.77  | (187)  |
| 0 - 0.67     | (127)  |

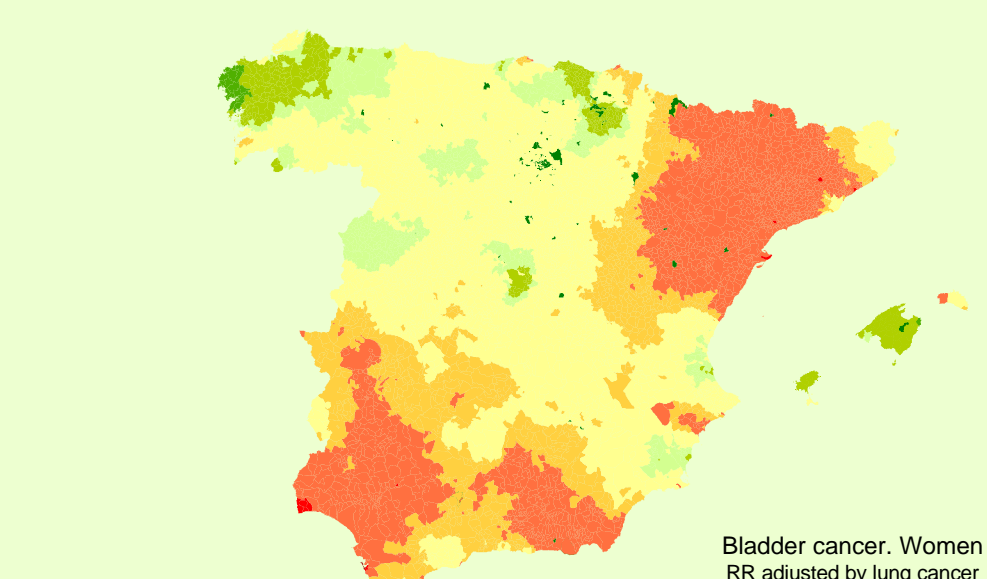

Bladder cancer. Women  
RR adjusted by lung cancer

|              |        |
|--------------|--------|
| 1.5 and more | (1)    |
| 1.3 - 1.5    | (10)   |
| 1.1 - 1.3    | (1774) |
| 1.05 - 1.1   | (1088) |
| 0.95 - 1.05  | (3987) |
| 0.91 - 0.95  | (745)  |
| 0.77 - 0.91  | (443)  |
| 0.67 - 0.77  | (23)   |
| 0 - 0.67     | (121)  |

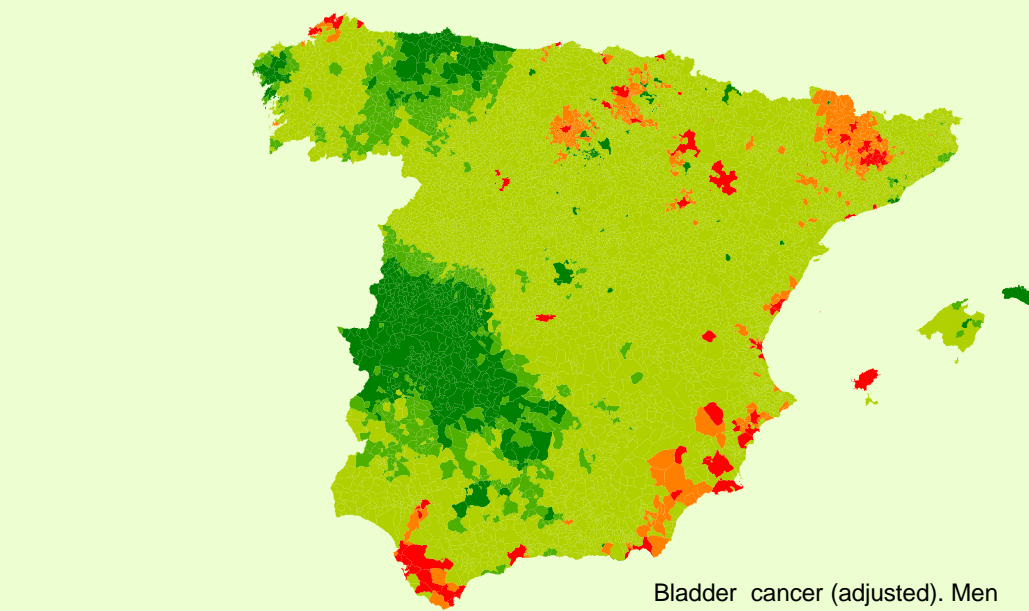

Bladder cancer (adjusted). Men  
Posterior probability RR>1

|           |        |
|-----------|--------|
| 0.9 - 1   | (113)  |
| 0.8 - 0.9 | (368)  |
| 0.2 - 0.8 | (6548) |
| 0.1 - 0.2 | (590)  |
| 0 - 0.1   | (573)  |

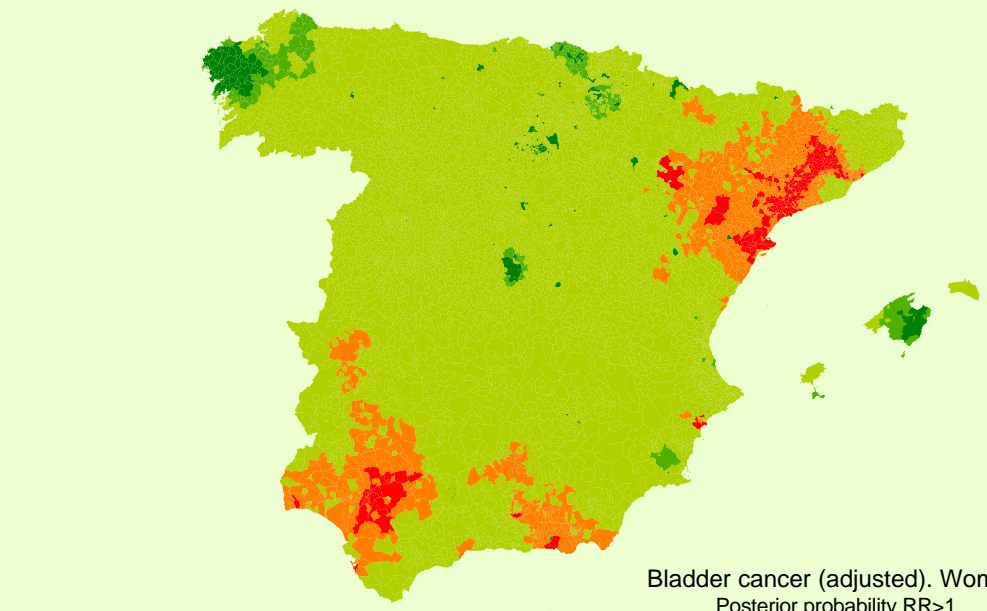

Bladder cancer (adjusted). Women  
Posterior probability RR>1

|           |        |
|-----------|--------|
| 0.9 - 1   | (195)  |
| 0.8 - 0.9 | (725)  |
| 0.2 - 0.8 | (6814) |
| 0.1 - 0.2 | (257)  |
| 0 - 0.1   | (201)  |
